## THE ANESTHESIOLOGIST'S BOOKSHELF

HUBERTA M. LIVINGSTONE, M.D., *Editor*

**Pediatric Anesthesiology.** By M. DIGNY LEIGH, M.D., Associate Professor of Surgery (Anesthesia), University of Southern California and Director, Department of Anesthesia, Children's Hospital of Los Angeles, and M. KATHLEEN BELTON, M.D., Assistant Professor of Surgery (Anesthesia), University of Southern California, and Attending Anesthesiologist, Children's Hospital of Los Angeles. (In collaboration with George B. Lewis, Jr., M.D. and Edward B. Scott, M.D., Assisting Attending Anesthesiologists, Children's Hospital of Los Angeles.) Second Edition. Cloth. Price \$12.00. Pp. 461, with 203 figures. The Macmillan Co., New York, N. Y., 1960.

Written by authors who are eminently qualified to discuss pediatric anesthesia from their own experience, the second edition of "Pediatric Anesthesia," renamed "Pediatric Anesthesiology" apparently to conform to the now more readily acceptable definition of the specialty, unfortunately falls short of the impact produced by the initial edition of twelve years ago. This is in part due to the fact that this subject matter is no longer virgin territory in terms of publication, and in part due to the peculiar format of this edition which varies from reference book to study manual, and skips from outline to rhetoric with reckless abandon and seeming lack of purpose.

A studied attempt has been made to cover too vast an area, leading to such superfluous items as a one page chapter on "Evaluation of the Organs of Special Sense (Eye and Ear)," and repeated over-emphasis on the bizarre and unusual in pediatric pathology. Sections of the book, such as that made up by the last twelve chapters covering the "Anesthetic Management of Surgical Procedures," are extremely well-done and reflect the vast personal clinical experience of the authors. Of excellent quality, and surprising diversity, considering Dr. Leigh's high personal regard for nonbreathing systems, are the chapters on anesthetic

techniques and equipment. These chapters, as is true of the last twelve mentioned previously, are liberally sprinkled with many of the 203 figures included in this well-indexed volume.

In the reviewer's opinion, this second edition can function as a useful adjuvant to an existing publication of recent printing that now serves as an authoritative text on the anesthetic management of the pediatric patient.

J. G. CONVERSE, M.D.

**A Practice of Anaesthesia.** By W. D. WYLIE, M.A., M.B. (CANTAB.), M.R.C.P., F.F.A.R.C.S., Consultant Anaesthetist, St. Thomas's Hospital, The National Hospital for Nervous Diseases, and The Royal Masonic Hospital, London; and H. C. CHURCHILL-DAVIDSON, M.A., M.D. (CANTAB.), F.F.A.R.C.S., Consultant Anaesthetist, St. Thomas's Hospital, The Chelsea Hospital for Women, and The Brompton Hospital, London. Foreword by M. D. Noseworthy. Cloth, \$20.00. Pp. 1056, with 246 photographic and line-drawing figures, 67 tables, and a 5-page vade mecum. Year Book Publishers, Inc., Chicago, by arrangement with Lloyd-Luke (Medical Books) Ltd., 1960. Printed in England by Hazell Watson and Viney Ltd., Aylesbury and Slough.

Almost twenty years have passed since the publication of Lundy's classical compendium, "Clinical Anesthesia." Advances in this specialty have been so rapid during the intervening time as to precipitate frustration and insecurity in the conscientious clinical anesthesiologist, who must have probed innumerable sources, in monographs and journals, in his efforts to keep abreast of those advances.

Doctors Wylie and Churchill-Davidson have published this unique textbook for the experienced anesthesiologist, gathering together "the greater part of that widely-scattered knowledge which the anaesthetist of today is expected to possess."
